# Supplementary material
Source: Springer Nature journal article supplement (https://www.springermedizin.de/resource/supplementary/12998_2013_124_MOESM4_ESM.pdf/9680208)
Supplement: MOESM4 [file 9680208]

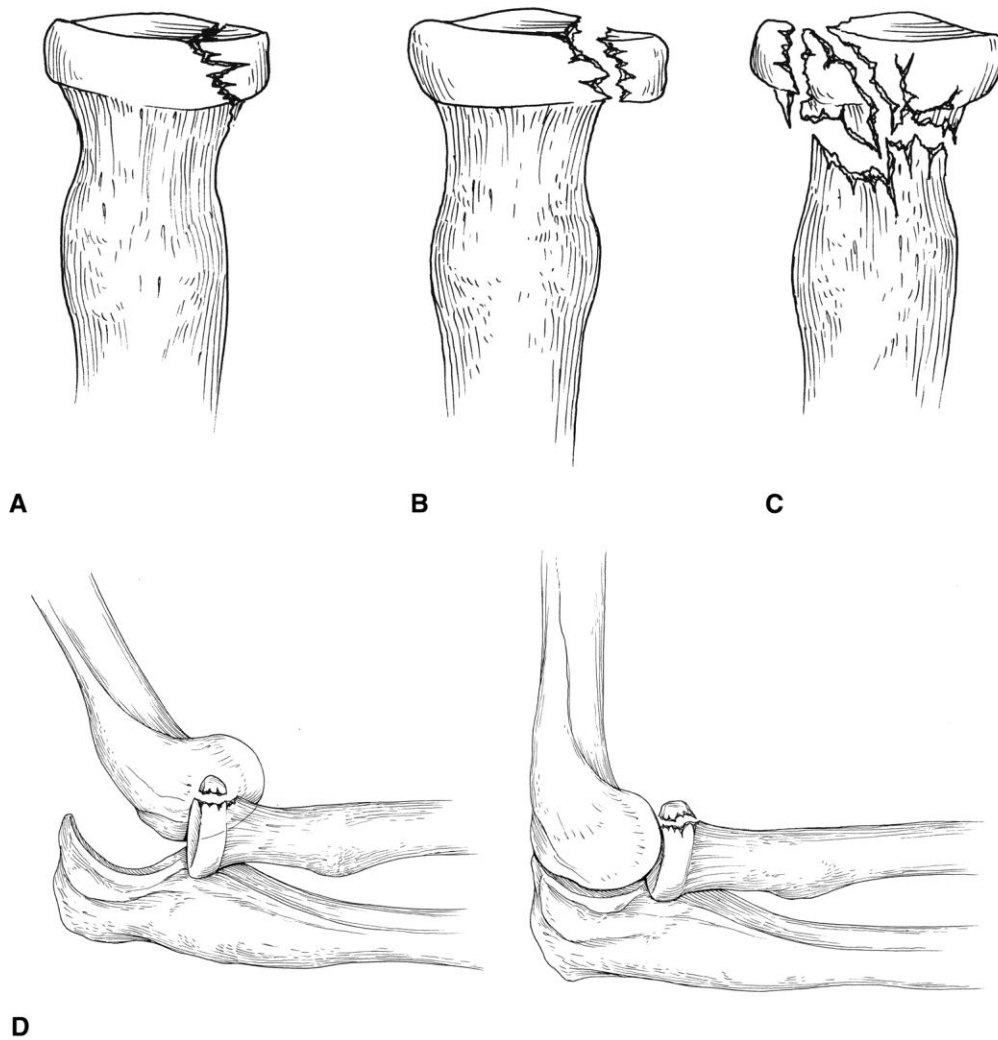

Figure 1

Mason classification of radial head/neck fractures. A, Type I, nondisplaced. B, Type II, displaced partial articular fracture of  $\geq 2\text{mm}$  displacement or  $\geq 30\%$  of the articular surface. C, Type III, comminuted fracture. D, A type IV injury, described by Johnson<sup>23</sup> in 1962, indicates an associated ipsilateral ulnohumeral dislocation. Image from Terrible Triad Injury of the Elbow: Current Concepts, JAAOS March 2009 vol. 17 no. 3 137-151<sup>24</sup>
